# Supplementary material
Source: PubMed Central journal article supplement (PMC9097909)
Supplement: NIHMS1793488-supplement-1.pdf [file NIHMS1793488-supplement-1.pdf]

1  
2  
3  
4 903 **Supplementary materials:**

5  
6  
7 904 **Fig. S1:** impact kinematic profiles for a selected case used in cross-validation.

8  
9 905 **Fig. S2:** impact kinematic profiles for a selected case used in independent testing.

10  
11  
12 906 **Fig. S3–S5:** Performances for 11 independent test cases from various published sources.

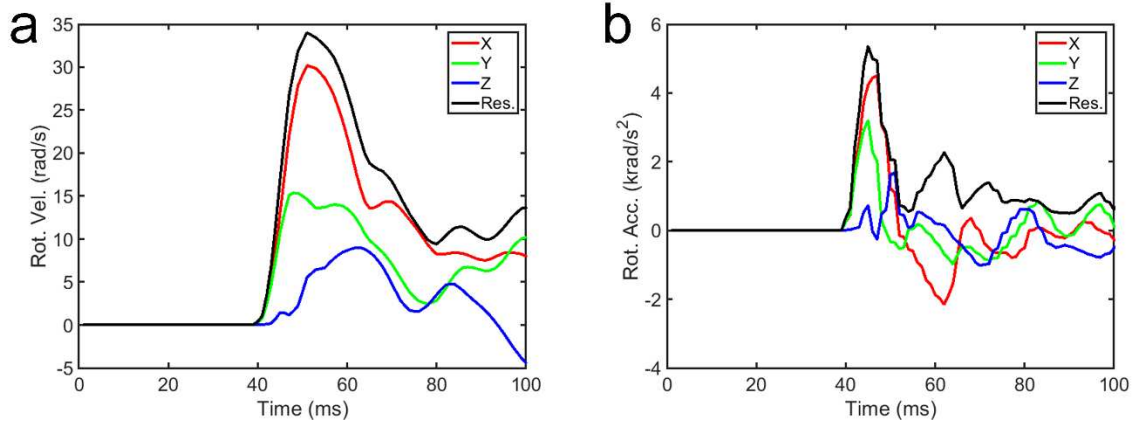

907

908 **Fig. S1.** (a)  $v_{rot}$  and (b)  $a_{rot}$  profiles for a representative impact used to cross-validate displacement  
909 prediction performance of the TNN/CNN models shown in **Fig. 8** in the main paper.

910

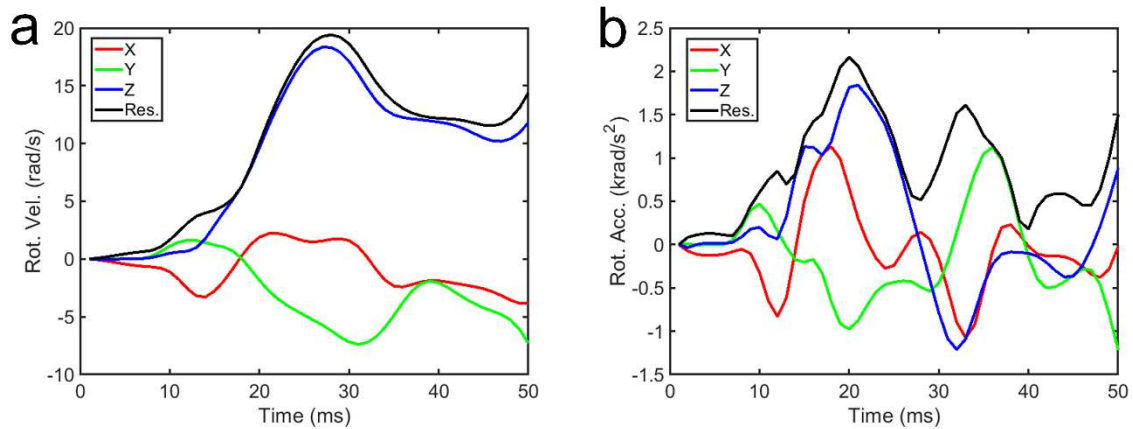

911

912 **Fig. S2.** (a)  $v_{rot}$  and (b)  $a_{rot}$  profiles for a representative impact in the independent testing dataset used to  
913 evaluate displacement prediction performances of the TNN/CNN models shown in **Fig. 10** in the main paper.

914 The profiles were further shifted and padded before serving as input to the TNN/CNN for displacement  
 915 estimation.

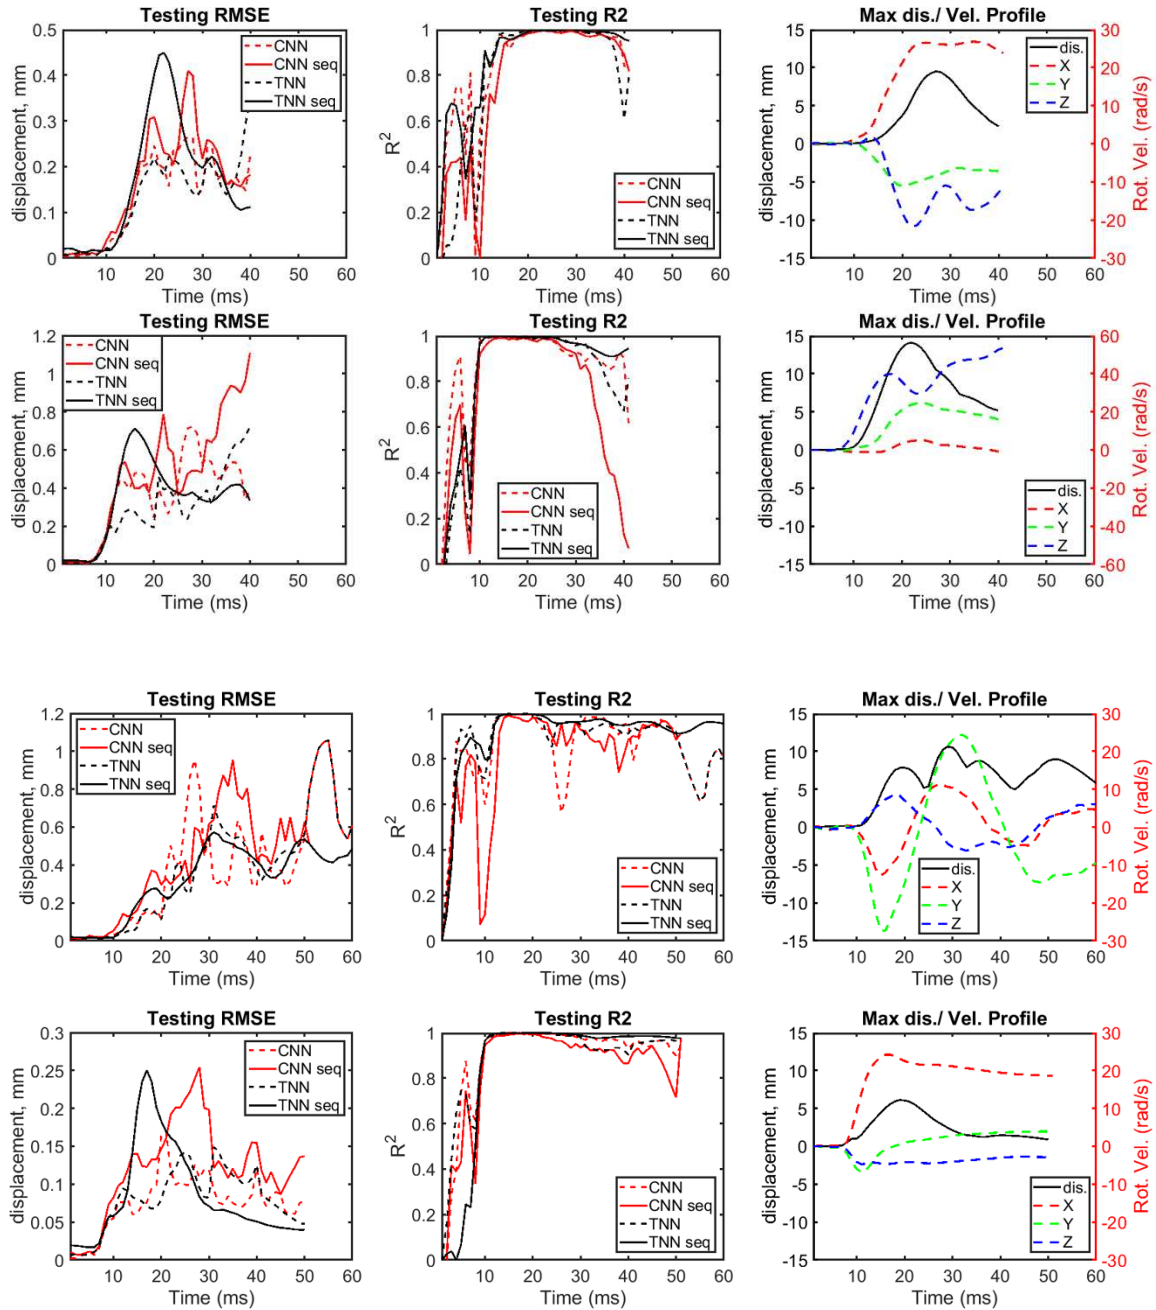

916

917

918 **Fig. S3.** Performance comparisons among TNN/CNN baseline and sequential training strategies in terms of  
 919 RMSE and  $R^2$  for selected impact Cases 1 through 4 (Table 3). The corresponding maximum displacement  
 920 magnitude over time is also provided together with the three rotational velocity components.

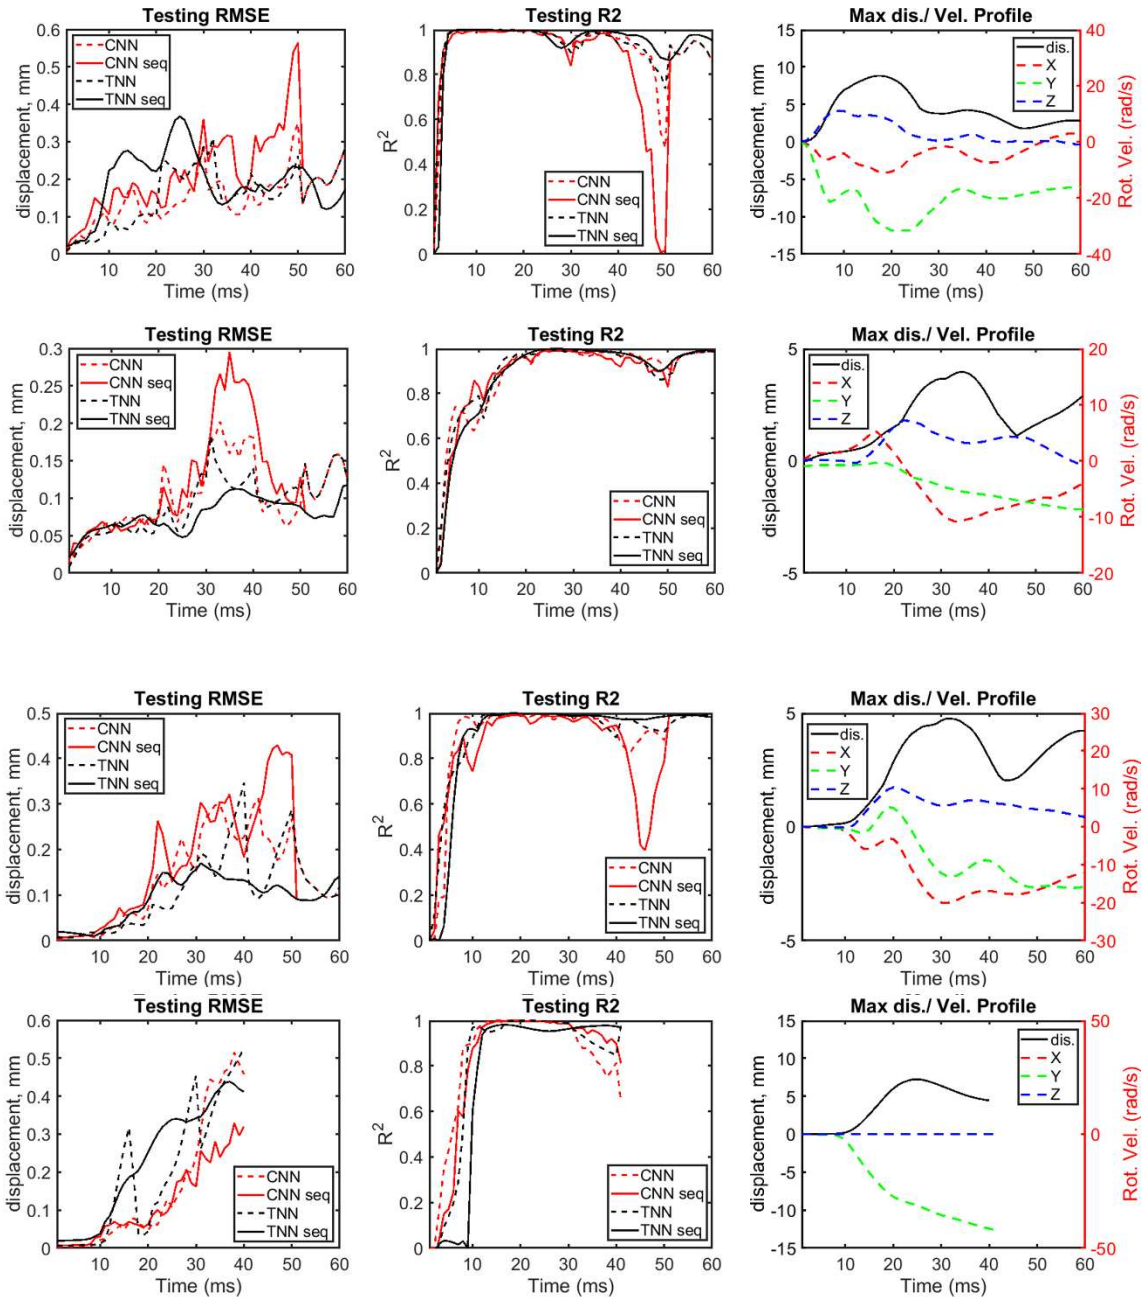

923 **Fig. S4.** Performance comparisons among TNN/CNN baseline and sequential training strategies in terms of  
 924 RMSE and  $R^2$  for selected impact Cases 5 through 8 (Table 3). The corresponding maximum displacement  
 925 magnitude over time is also provided together with the three rotational velocity components.

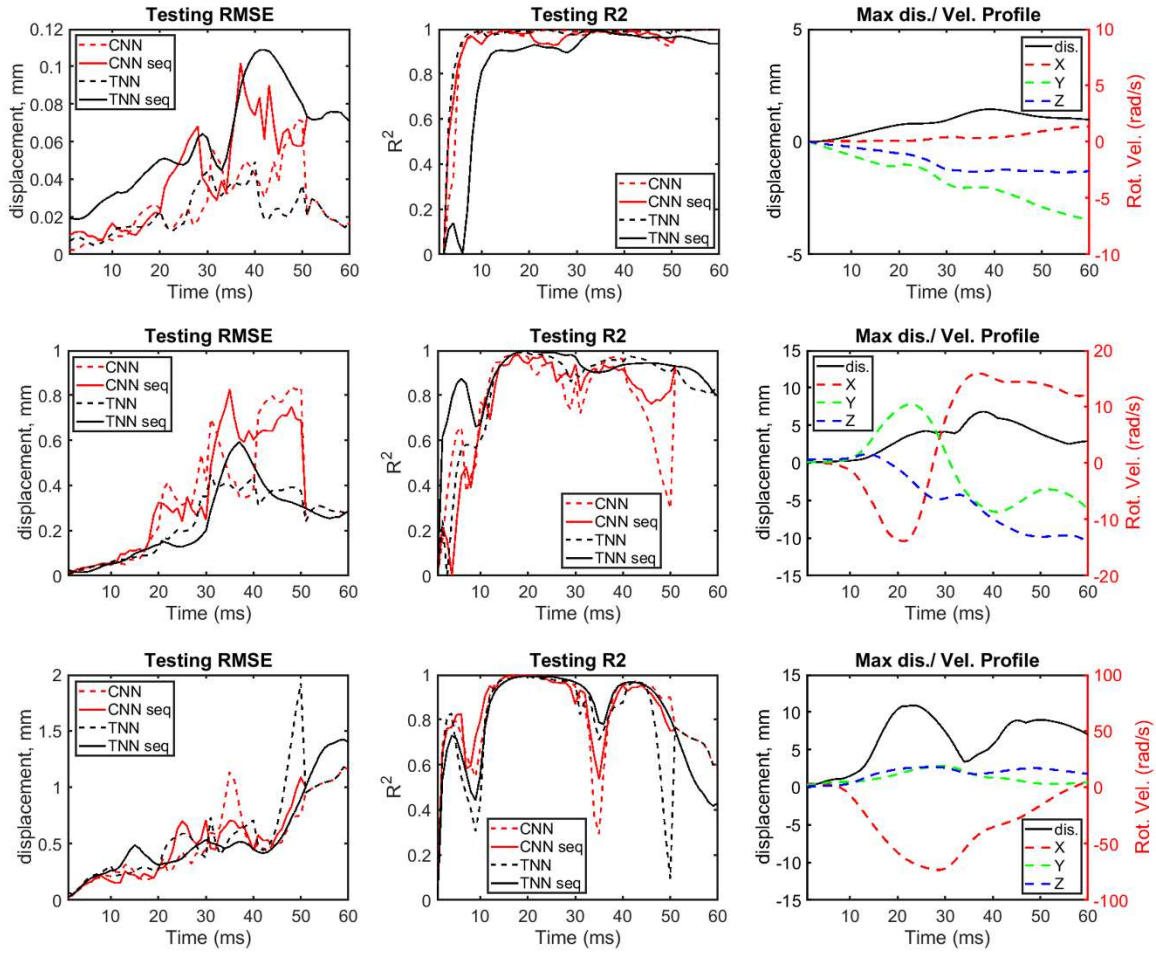

926

927 **Fig. S5.** Performance comparisons among TNN/CNN baseline and sequential training strategies in terms of  
 928 RMSE and  $R^2$  for selected impact Cases 9 through 11 (Table 3). The corresponding maximum displacement  
 929 magnitude over time is also provided together with the three rotational velocity components.
